# Supplementary material for: A real-world study of pneumonitis in non-small cell lung cancer patients receiving durvalumab following concurrent chemoradiation
Source: PubMed Central journal article supplement — J Thorac Dis. 2023 Nov 23;15(12):6427–35. doi: 10.21037/jtd-22-1604 (PMC10797388; doi:10.21037/jtd-22-1604), 2023-11-23
Supplement: jtd-15-12-6427-dss.pdf [file jtd-15-12-6427-dss.pdf]

## Data Sharing Statement

|                     |                                                                                                                                                    |                                                                                                                                      |
|---------------------|----------------------------------------------------------------------------------------------------------------------------------------------------|--------------------------------------------------------------------------------------------------------------------------------------|
| <b>Article Info</b> | <a href="https://dx.doi.org/10.21037/jtd-22-1604">https://dx.doi.org/10.21037/jtd-22-1604</a>                                                      |                                                                                                                                      |
| <b>Item</b>         | <b>Question</b>                                                                                                                                    | <b>Authors' Response<br/>(place "-" if not applicable)</b>                                                                           |
| 1                   | Would you like to share data collected for your study to others?                                                                                   | Yes                                                                                                                                  |
| 2                   | If not, would you like to share the reason for your decision?                                                                                      | -                                                                                                                                    |
| 3                   | What data in particular will be shared?                                                                                                            | The survival data in particular will be shared, as well as predictors of pneumonitis development, particularly BMI and COPD severity |
| 4                   | Any other documents will be share? Such as study protocol, statistical analysis plan, informed consent form, clinical study report, analytic code. | Statistical analysis plan and informed consent form, will also be shared if requested.                                               |
| 5                   | When will data availability begin?                                                                                                                 | From the publication date.                                                                                                           |
| 6                   | When will data availability end?                                                                                                                   | Two years within the publication date                                                                                                |
| 7                   | To whom will you share the data?                                                                                                                   | Medical Oncologists, Radiation Oncologists                                                                                           |
| 8                   | For what type of analysis or purpose?                                                                                                              | For analysis to evaluate the risk administering Durvalumab to patients with non-small cell lung cancer                               |
| 9                   | How or where can the data/documents be obtained?                                                                                                   | Emails could be sent to the address below to obtain the shared data: <a href="mailto:nehaakkad@gmail.com">nehaakkad@gmail.com</a>    |
| 10                  | Any other restrictions?                                                                                                                            | We may balance the potential benefits and risks for each request and then provide the data that could be shared.                     |
